# Supplementary material for: Smoking Cessation Apps: A Systematic Review of Format, Outcomes, and Features
Source: MDPI journal article supplement (doi:10.3390/ijerph182111664), 2021-11-06
Supplement: s1 [file s1]

## Supplemental Material

**Table S1.** Literature search strategy.

|    | Searches PUBMED                                                                                                                                                                                                                                                                           |
|----|-------------------------------------------------------------------------------------------------------------------------------------------------------------------------------------------------------------------------------------------------------------------------------------------|
| 1  | ((("Smoking*" OR "Tobacco Products" OR "Tobacco" OR "Tobacco Use" OR "Tobacco Use Disorder" OR "Smoke*" OR "Cigar*" OR "Nicotine" OR "Nicotine Dependence") AND ("Cessation" OR "Prevent*" OR "Quit*" OR "Abstinence" OR "Treatment" OR "Intervention" OR "Stop" OR "Therapy" OR "Care")) |
| 2  | "Smoking Cessation"                                                                                                                                                                                                                                                                       |
| 3  | "Quit Smoking"                                                                                                                                                                                                                                                                            |
| 4  | "Stop Smoking"                                                                                                                                                                                                                                                                            |
| 5  | "Tobacco Use Disorder"                                                                                                                                                                                                                                                                    |
| 6  | "Tobacco Use Cessation Products"                                                                                                                                                                                                                                                          |
| 7  | "Tobacco Use Cessation"                                                                                                                                                                                                                                                                   |
| 8  | 1 OR 2 OR 3 OR 4 OR 5 OR 6 OR 7                                                                                                                                                                                                                                                           |
| 9  | "Telephone"                                                                                                                                                                                                                                                                               |
| 10 | "Phone"                                                                                                                                                                                                                                                                                   |
| 11 | "Mobile Phone"                                                                                                                                                                                                                                                                            |
| 12 | "Cell Phone"                                                                                                                                                                                                                                                                              |
| 13 | "Smartphone"                                                                                                                                                                                                                                                                              |
| 14 | "Smartphone app*"                                                                                                                                                                                                                                                                         |
| 15 | "App" OR "Apps" OR "Application" OR "Applications"                                                                                                                                                                                                                                        |
| 16 | "Mobile app*"                                                                                                                                                                                                                                                                             |
| 17 | "Mobile health"                                                                                                                                                                                                                                                                           |
| 18 | "Digital*"                                                                                                                                                                                                                                                                                |
| 19 | "eHealth"                                                                                                                                                                                                                                                                                 |
| 20 | "e Health"                                                                                                                                                                                                                                                                                |
| 21 | "e-Health"                                                                                                                                                                                                                                                                                |
| 22 | "mHealth"                                                                                                                                                                                                                                                                                 |
| 23 | "m Health"                                                                                                                                                                                                                                                                                |
| 24 | "m-Health"                                                                                                                                                                                                                                                                                |
| 25 | "uHealth"                                                                                                                                                                                                                                                                                 |
| 26 | "u Health"                                                                                                                                                                                                                                                                                |
| 27 | "u-Health"                                                                                                                                                                                                                                                                                |
| 28 | "Telehealth"                                                                                                                                                                                                                                                                              |
| 29 | "Tele-health"                                                                                                                                                                                                                                                                             |
| 30 | "Tele health"                                                                                                                                                                                                                                                                             |
| 31 | 9 OR 10 OR 11 OR 12 OR 13 OR 14 OR 15 OR 16 OR 17 OR 18 OR 19 OR 20 OR 21 OR 22 OR 23 OR 24 OR 25 OR 26 OR 27 OR 28 OR 29 OR 30                                                                                                                                                           |
| 32 | 8 AND 31                                                                                                                                                                                                                                                                                  |
|    | Limit to human                                                                                                                                                                                                                                                                            |
|    | English and Spanish                                                                                                                                                                                                                                                                       |
|    | Title/Abstract                                                                                                                                                                                                                                                                            |

|    |                                                                                                                                                                                                                                                                                           |
|----|-------------------------------------------------------------------------------------------------------------------------------------------------------------------------------------------------------------------------------------------------------------------------------------------|
|    | Searches PsycINFO                                                                                                                                                                                                                                                                         |
| 1  | ((("Smoking*" OR "Tobacco Products" OR "Tobacco" OR "Tobacco Use" OR "Tobacco Use Disorder" OR "Smoke*" OR "Cigar*" OR "Nicotine" OR "Nicotine Dependence") AND ("Cessation" OR "Prevent*" OR "Quit*" OR "Abstinence" OR "Treatment" OR "Intervention" OR "Stop" OR "Therapy" OR "Care")) |
| 2  | "Smoking Cessation"                                                                                                                                                                                                                                                                       |
| 3  | "Quit Smoking"                                                                                                                                                                                                                                                                            |
| 4  | "Stop Smoking"                                                                                                                                                                                                                                                                            |
| 5  | "Tobacco Use Disorder"                                                                                                                                                                                                                                                                    |
| 6  | "Tobacco Use Cessation Products"                                                                                                                                                                                                                                                          |
| 7  | "Tobacco Use Cessation"                                                                                                                                                                                                                                                                   |
| 8  | 1 OR 2 OR 3 OR 4 OR 5 OR 6 OR 7                                                                                                                                                                                                                                                           |
| 9  | "Telephone"                                                                                                                                                                                                                                                                               |
| 10 | "Phone"                                                                                                                                                                                                                                                                                   |
| 11 | "Mobile Phone"                                                                                                                                                                                                                                                                            |
| 12 | "Cell Phone"                                                                                                                                                                                                                                                                              |
| 13 | "Smartphone"                                                                                                                                                                                                                                                                              |
| 14 | "Smartphone app*"                                                                                                                                                                                                                                                                         |
| 15 | "App" OR "Apps" OR "Application" OR "Applications"                                                                                                                                                                                                                                        |
| 16 | "Mobile app*"                                                                                                                                                                                                                                                                             |
| 17 | "Mobile health"                                                                                                                                                                                                                                                                           |
| 18 | "Digital*"                                                                                                                                                                                                                                                                                |
| 19 | "eHealth"                                                                                                                                                                                                                                                                                 |
| 20 | "e Health"                                                                                                                                                                                                                                                                                |
| 21 | "e-Health"                                                                                                                                                                                                                                                                                |
| 22 | "mHealth"                                                                                                                                                                                                                                                                                 |
| 23 | "m Health"                                                                                                                                                                                                                                                                                |
| 24 | "m-Health"                                                                                                                                                                                                                                                                                |
| 25 | "uHealth"                                                                                                                                                                                                                                                                                 |
| 26 | "u Health"                                                                                                                                                                                                                                                                                |
| 27 | "u-Health"                                                                                                                                                                                                                                                                                |
| 28 | "Telehealth"                                                                                                                                                                                                                                                                              |
| 29 | "Tele-health"                                                                                                                                                                                                                                                                             |
| 30 | "Tele health"                                                                                                                                                                                                                                                                             |
| 31 | 9 OR 10 OR 11 OR 12 OR 13 OR 14 OR 15 OR 16 OR 17 OR 18 OR 19 OR 20 OR 21 OR 22 OR 23 OR 24 OR 25 OR 26 OR 27 OR 28 OR 29 OR 30                                                                                                                                                           |
| 32 | 8 AND 31                                                                                                                                                                                                                                                                                  |
|    | Limit to human                                                                                                                                                                                                                                                                            |
|    | English and Spanish                                                                                                                                                                                                                                                                       |
|    | Abstract                                                                                                                                                                                                                                                                                  |
|    | Limit to research journals (books and dissertations excluded)                                                                                                                                                                                                                             |
